# Supplementary material
Source: PubMed Central journal article supplement (PMC9974748)
Supplement: NIHMS1852976-supplement-Supplemental_Digital_Content_2.pdf [file NIHMS1852976-supplement-Supplemental_Digital_Content_2.pdf]

## Appendix 1. Summit Presenters

New York Academy of Medicine (NYAM)

Judith Salerno, MD, MS

Danielle Laraque-Arena, MD, FAAP (Co-Chair, MCH Equity Summit)

Perelman School of Medicine, Department of Obstetrics and Gynecology

Elizabeth Howell, MD, MPP (Co-Chair, MCH Equity Summit)

### *I. Maternal Health Disparities*

Quality, Disparities, and the Current Maternal Health Crisis (R01MD007651)

Elizabeth Howell, MD, MPP

#### Featured Speaker:

UCSF School of Medicine, Department of Obstetrics and Gynecology

Karen A. Scott, MD, MPH, FACOG

#### Panel 1:

NYC Health + Hospitals, Department of Obstetrics and Gynecology

Wendy C. Wilcox, MD, MBA, MPH, FACOG

Yale School of Nursing

Sascha James-Conterelli, DNP, CNM, LM, FACNM

Ancient Song Doula Services

Chanel Porchia-Albert, CD, CLC, CHHC

Morehouse School of Medicine, Center for Maternal Health Equity

Natalie D. Hernandez, PhD, MPH

Massachusetts General Hospital, Department of Obstetrics and Gynecology

Allison Bryant, MD, MPH

### *II. Neonatal Health Disparities*

Quality, Disparities, and Very Preterm Birth Morbidity and Mortality (R01HD078565)

Elizabeth Howell, MD, MPP

#### Featured Speaker:

Vermont Oxford Network

Jeffrey D. Horbar, MD

#### Panel 2:

The Children's Hospital at Montefiore

Deborah E. Campbell, MD

Mount Sinai Icahn School of Medicine, Blavatnik Family Women's Health Research Institute

Teresa Janevic, PhD, MPH

Northern Manhattan Perinatal Partnership

Adrienne Mercer EdD, CHES

### *III. Mom-Baby Dyad*

#### Featured Speaker:

National Institute for Health and Medical Research (INSERM), France

Jennifer Zeitlin, DSc

#### Panel 3:

City University of New York (CUNY) Graduate School of Public Health

Lynn Roberts, PhD

Stanford University School of Medicine, Department of Pediatrics

Jochen Profit, MD, MPH

Columbia University, Department of Obstetrics and Gynecology

Mary E. D'Alton, MD

Urban Health Plan

Colette Sturgis, MA-MCHS

Krishnamoorthi M, Balbierz A, Arena DL, Howell EA. Addressing the national crisis facing black and latina women, birthing people, and infants: The Maternal and Infant Health Equity Summit. *Obstet Gynecol* 2023;141.

The authors provided this information as a supplement to their article.

©2023 American College of Obstetricians and Gynecologists.
